# Supplementary material for: Month 2 Culture Status and Treatment Duration as Predictors of Tuberculosis Relapse Risk in a Meta-Regression Model
Source: PubMed Central journal article supplement (PMC3733776; doi:10.1371/journal.pone.0071116), 2013-08-05

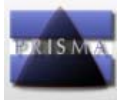

## PRISMA 2009 Flow Diagram

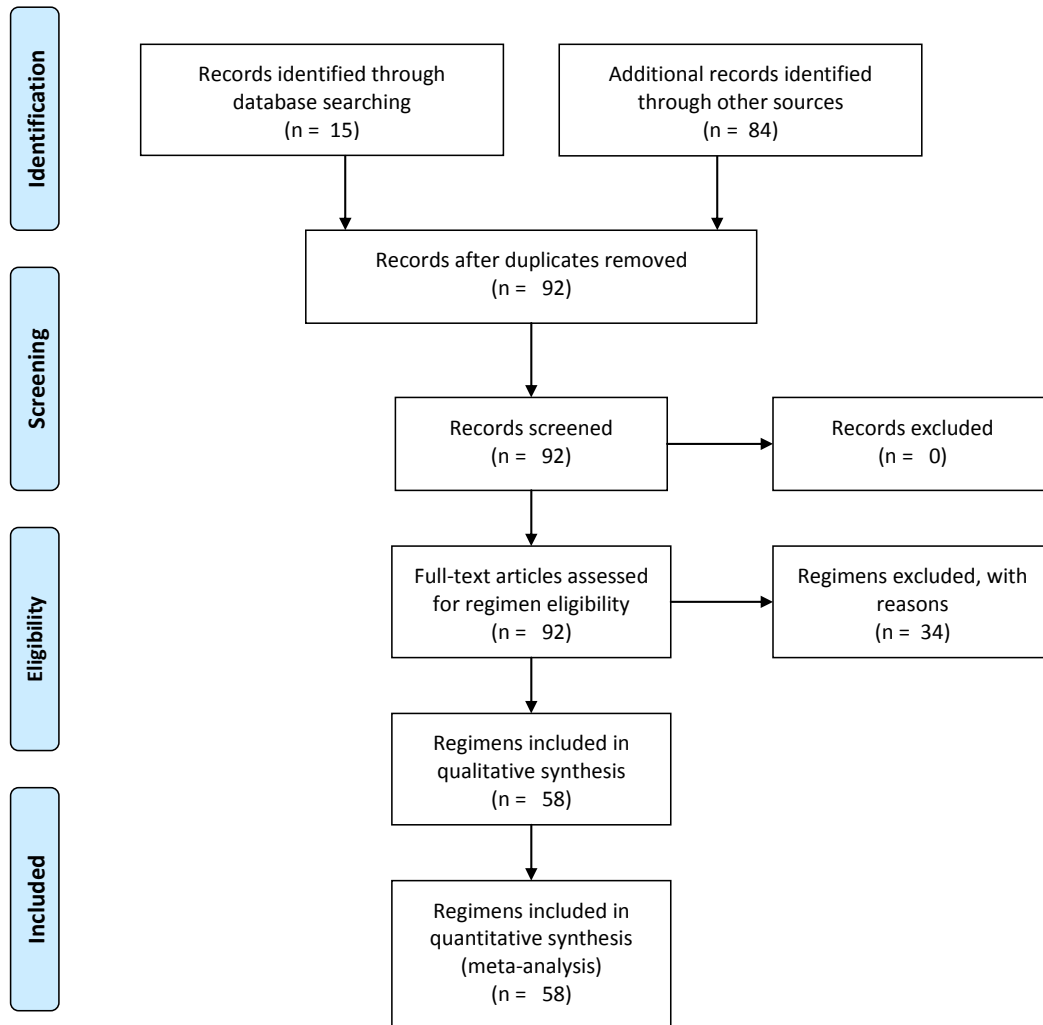

Supplement: pone.0071116.s001.pdf [file pone.0071116.s001.pdf]
