# Supplementary material for: Month 2 Culture Status and Treatment Duration as Predictors of Tuberculosis Relapse Risk in a Meta-Regression Model
Source: PLOS journal article supplement (doi:10.1371/journal.pone.0071116), 2013-08-05
Supplement: S6 (10.1371/journal.pone.0071116.s006) [file journal.pone.0071116.s006]

| Study no | Site      | Regimen                                                                                                    | Duration (mo) | Patients | Relapse risk | 2-mo cult pos risk | RZ  | Region | Refs       |
|----------|-----------|------------------------------------------------------------------------------------------------------------|---------------|----------|--------------|--------------------|-----|--------|------------|
| 1        | Africa    | SHR                                                                                                        | 6             | 152      | 0.03         | 0.31               | 0.5 | 1      | [1]        |
| 2        | Africa    | SHZ                                                                                                        | 6             | 153      | 0.08         | 0.34               | 0.5 | 1      | [2]        |
| 3        | Africa    | SHT                                                                                                        | 6             | 104      | 0.22         | 0.58               | 0   | 1      | [3]        |
| 4        | Africa    | 2STH/TH                                                                                                    | 18            | 133      | 0.03         | 0.44               | 0   | 1      | [4]        |
| 4        | Africa    | SH                                                                                                         | 6             | 112      | 0.29         | 0.51               | 0   | 1      | [4]        |
| 5        | Africa    | SHR                                                                                                        | 6             | 171      | 0.02         | 0.3                | 0.5 | 1      | [5]        |
| 6        | Africa    | HR                                                                                                         | 6             | 164      | 0.07         | 0.36               | 0.5 | 1      | [6]        |
| 7        | Africa    | 2SHRZ/HRZ                                                                                                  | 4             | 104      | 0.16         | 0.15               | 1   | 1      | [7]        |
| 8        | Africa    | 2SHRZ/HR                                                                                                   | 4             | 104      | 0.11         | 0.15               | 1   | 1      | [8]        |
| 9        | Africa    | 2SHRZ/HR                                                                                                   | 6             | 166      | 0.03         | 0.16               | 1   | 1      | [9]        |
| 10       | Africa    | 1.5SHRZ/H+(SRZ)                                                                                            | 7             | 114      | 0.05         | 0.15               | 1   | 1      | [10]       |
| 11       | Hong Kong | S <sub>3</sub> H <sub>3</sub> R <sub>3</sub> Z <sub>3</sub> -Z <sub>2</sub> *                              | 6             | 220      | 0.03         | 0.09               | 0.5 | 0      | [11]       |
| 11       | Hong Kong | S <sub>3</sub> H <sub>3</sub> R <sub>3</sub> Z <sub>3</sub> -Z <sub>6</sub>                                | 6             | 208      | 0.03         | 0.09               | 0.5 | 0      | [11]       |
| 11       | Hong Kong | S <sub>3</sub> H <sub>3</sub> R <sub>3</sub> Z <sub>3</sub> -Z <sub>4</sub>                                | 6             | 205      | 0.05         | 0.09               | 0.5 | 0      | [11]       |
| 11       | Hong Kong | H <sub>3</sub> R <sub>3</sub> Z <sub>3</sub> -Z <sub>6</sub>                                               | 6             | 199      | 0.06         | 0.12               | 0.5 | 0      | [11]       |
| 12       | Hong Kong | S <sub>3</sub> H <sub>3</sub> R <sub>3</sub> Z <sub>3</sub>                                                | 6             | 49       | 0.2          | 0.2                | 0.5 | 0      | [12]       |
| 12       | Hong Kong | S <sub>3</sub> H <sub>3</sub> R <sub>3</sub> Z <sub>3</sub>                                                | 8             | 50       | 0.02         | 0.2                | 0.5 | 0      | [12]       |
| 13       | Singapore | 2SHRZ(S)/H <sub>3</sub> R <sub>3</sub>                                                                     | 6             | 47       | 0            | 0.02               | 1   | 0      | [13]       |
| 13       | Singapore | 1SHRZ(S)/H <sub>3</sub> R <sub>3</sub>                                                                     | 6             | 46       | 0.02         | 0.08               | 1   | 0      | [13]       |
| 13       | Singapore | 2HRZ(S)/H <sub>3</sub> R <sub>3</sub>                                                                      | 6             | 44       | 0.02         | 0.03               | 1   | 0      | [13]       |
| 13       | Singapore | 1SHRZ(C)/H <sub>3</sub> R <sub>3</sub>                                                                     | 6             | 42       | 0.05         | 0.08               | 1   | 0      | [13]       |
| 13       | Singapore | 2SHRZ(C)/H <sub>3</sub> R <sub>3</sub> †                                                                   | 6             | 46       | 0.07         | 0.02               | 1   | 0      | [13]       |
| 13       | Singapore | 2HRZ(C)/H <sub>3</sub> R <sub>3</sub>                                                                      | 6             | 40       | 0.08         | 0.03               | 1   | 0      | [13]       |
| 14       | India     | 2S <sub>3</sub> H <sub>3</sub> R <sub>3</sub> Z <sub>3</sub> /S <sub>2</sub> H <sub>2</sub> R <sub>2</sub> | 6             | 111      | 0.02         | 0.11               | 0.5 | 0      | [14]       |
| 14       | India     | 2S <sub>3</sub> H <sub>3</sub> R <sub>3</sub> Z <sub>3</sub> /R <sub>1</sub> H <sub>1</sub>                | 6             | 116      | 0.02         | 0.11               | 0.5 | 0      | [14]       |
| 14       | India     | 2S <sub>2</sub> H <sub>2</sub> R <sub>2</sub> Z <sub>2</sub> /S <sub>2</sub> H <sub>2</sub> R <sub>2</sub> | 6             | 108      | 0.03         | 0.11               | 0.5 | 0      | [14]       |
| 14       | India     | 2S <sub>3</sub> H <sub>3</sub> R <sub>3</sub> Z <sub>3</sub> /R <sub>2</sub> H <sub>2</sub>                | 6             | 101      | 0.03         | 0.11               | 0.5 | 0      | [14]       |
| 14       | India     | 2S <sub>2</sub> H <sub>2</sub> R <sub>2</sub> Z <sub>2</sub> /S <sub>1</sub> H <sub>1</sub> R <sub>1</sub> | 6             | 117      | 0.04         | 0.14               | 0.5 | 0      | [14]       |
| 14       | India     | 2S <sub>3</sub> H <sub>3</sub> R <sub>3</sub> Z <sub>3</sub> /S <sub>1</sub> H <sub>1</sub> R <sub>1</sub> | 6             | 111      | 0.05         | 0.11               | 0.5 | 0      | [14]       |
| 14       | India     | 2S <sub>2</sub> H <sub>2</sub> R <sub>2</sub> Z <sub>2</sub> /R <sub>2</sub> H <sub>2</sub>                | 6             | 102      | 0.06         | 0.14               | 0.5 | 0      | [14]       |
| 14       | India     | 2S <sub>2</sub> H <sub>2</sub> R <sub>2</sub> Z <sub>2</sub> /R <sub>1</sub> H <sub>1</sub>                | 6             | 109      | 0.07         | 0.14               | 0.5 | 0      | [14]       |
| 15       | Hong Kong | SHZ                                                                                                        | 9             | 65       | 0.05         | 0.23               | 0.5 | 0      | [15,16]    |
| 15       | Hong Kong | S <sub>3</sub> H <sub>3</sub> Z <sub>3</sub>                                                               | 9             | 65       | 0.06         | 0.3                | 0.5 | 0      | [15,16]    |
| 15       | Hong Kong | S <sub>2</sub> H <sub>2</sub> Z <sub>2</sub>                                                               | 9             | 49       | 0.06         | 0.28               | 0.5 | 0      | [15,16]    |
| 15       | Hong Kong | SHZ                                                                                                        | 6             | 60       | 0.18         | 0.23               | 0.5 | 0      | [15,16]    |
| 15       | Hong Kong | S <sub>2</sub> H <sub>2</sub> Z <sub>2</sub>                                                               | 6             | 39       | 0.21         | 0.28               | 0.5 | 0      | [15,16]    |
| 15       | Hong Kong | S <sub>3</sub> H <sub>3</sub> Z <sub>3</sub>                                                               | 6             | 68       | 0.24         | 0.3                | 0.5 | 0      | [15,16]    |
| 16       | Hong Kong | SHR                                                                                                        | 6             | 143      | 0.06         | 0.12               | 0.5 | 0      | [17,18]    |
| 17       | Singapore | 2SHRZ/HRZ                                                                                                  | 6             | 78       | 0            | 0.02               | 1   | 0      | [19–21]    |
| 17       | Singapore | 2SHRZ/HR                                                                                                   | 6             | 80       | 0.02         | 0.02               | 1   | 0      | [19–21]    |
| 17       | Singapore | 2SHRZ/HR                                                                                                   | 4             | 77       | 0.08         | 0.02               | 1   | 0      | [19–21]    |
| 17       | Singapore | 2SHRZ /HRZ                                                                                                 | 4             | 79       | 0.11         | 0.02               | 1   | 0      | [19–21]    |
| 18       | India     | 2SHZ/S <sub>2</sub> H <sub>2</sub> Z <sub>2</sub>                                                          | 7             | 129      | 0.04         | 0.28               | 0.5 | 0      | [22,23]    |
| 19       | India     | SHRZ                                                                                                       | 3             | 200      | 0.2          | 0.09               | 1   | 0      | [22,24]    |
| 19       | India     | 3SHZ/S <sub>2</sub> H <sub>2</sub> Z <sub>2</sub>                                                          | 5             | 199      | 0.13         | 0.26               | 0.5 | 0      | [22,24]    |
| 20       | Hong Kong | H <sub>3</sub> R <sub>3</sub> S <sub>3</sub> Z <sub>3</sub> E <sub>3</sub>                                 | 6             | 152      | 0.01         | 0.12               | 0.5 | 0      | [25–27]    |
| 20       | Hong Kong | H <sub>3</sub> R <sub>3</sub> S <sub>3</sub> Z <sub>3</sub>                                                | 6             | 151      | 0.01         | 0.1                | 0.5 | 0      | [25–27]    |
| 20       | Hong Kong | HRZE                                                                                                       | 6             | 163      | 0.01         | 0.06               | 1   | 0      | [25,26,28] |
| 20       | Hong Kong | H <sub>3</sub> R <sub>3</sub> Z <sub>3</sub> E <sub>3</sub>                                                | 6             | 160      | 0.02         | 0.1                | 0.5 | 0      | [25–27]    |
| 20       | Hong Kong | H <sub>3</sub> R <sub>3</sub> S <sub>3</sub> E <sub>3</sub>                                                | 6             | 166      | 0.08         | 0.24               | 0.5 | 0      | [25,26,28] |
| 21       | Singapore | 2SHRZ/H <sub>3</sub> R <sub>3</sub>                                                                        | 6             | 97       | 0.01         | 0.01               | 1   | 0      | [29,30]    |
| 21       | Singapore | 1SHRZ/H <sub>3</sub> R <sub>3</sub>                                                                        | 6             | 94       | 0.01         | 0.15               | 1   | 0      | [29,30]    |
| 21       | Singapore | 2HRZ/H <sub>3</sub> R <sub>3</sub>                                                                         | 6             | 109      | 0.01         | 0.1                | 1   | 0      | [29,30]    |
| 22       | global    | 2HRE/7RH                                                                                                   | 9             | 445      | 0.028        | 0.269              | 0.5 | 0.5    | [31]       |
| 22       | global    | 2RHEZ/4RH                                                                                                  | 6             | 617      | 0.035        | 0.178              | 1   | 0.5    | [31]       |
| 23       | global    | 2RHEZ/4HR                                                                                                  | 6             | 347      | 0.05         | 0.17               | 1   | 0.5    | [32]       |
| 24       | Uganda    | 2HREZ/6HR                                                                                                  | 8             | 266      | 0.048        | 0.02               | 1   | 1      | [33]       |
| 24       | Uganda    | 2HREZ/4HR                                                                                                  | 6             | 147      | 0.097        | 0.05               | 1   | 1      | [33]       |

## References

1. East African-British Medical Research Councils (1972) Controlled clinical trial of short-course (6-month) regimens of chemotherapy for treatment of pulmonary tuberculosis. *Lancet* 1: 1079-1085.
2. East African-British Medical Research Councils (1973) Controlled clinical trial of four short-course (6-month) regimens of chemotherapy for treatment of pulmonary tuberculosis. Second report. *Lancet* 1: 1331-1338.
3. East African-British Medical Research Councils (1974) Controlled clinical trial of four short-course (6-month) regimens of chemotherapy for treatment of pulmonary tuberculosis. Third report. *Lancet* 2: 237-240.
4. East African-British Medical Research Councils (1977) Results at 5 years of a controlled comparison of a 6-month and a standard 18-month regimen of chemotherapy for pulmonary tuberculosis. *Am Rev Respir Dis* 116: 3-8.
5. East African-British Medical Research Councils (1974) Controlled clinical trial of four short-course (6-month) regimens of chemotherapy for treatment of pulmonary tuberculosis. *Lancet* 2: 1100-1106.
6. East African-British Medical Research Councils (1976) Controlled clinical trial of four 6-month regimens of chemotherapy for pulmonary tuberculosis. Second report. *Am Rev Respir Dis* 114: 471-475.
7. East African-British Medical Research Councils (1978) Controlled clinical trial of five short-course (4-month) chemotherapy regimens in pulmonary tuberculosis. First report of 4th study. *Lancet* 2: 334-338.
8. East African-British Medical Research Councils (1981) Controlled clinical trial of five short-course (4-month) chemotherapy regimens in pulmonary tuberculosis. Second report of the 4th study. *Am Rev Respir Dis* 123: 165-170.
9. East and Central African-British Medical Research Council (1983) Controlled clinical trial of 4 short-course regimens of chemotherapy (three 6-month and one 8-month) for pulmonary tuberculosis. *Tubercle* 64: 153-166.
10. Tanzania-British Medical Research Council (1996) A controlled trial of a 4-weekly supplement of rifampicin, pyrazinamide and streptomycin in the continuation phase of a 7-month daily chemotherapy regimen for pulmonary tuberculosis. *S Afr Med J* 86: 960-965.
11. Hong Kong Chest Service-British Medical Research Council (1991) Controlled trial of 2, 4, and 6 months of pyrazinamide in 6-month, three-times-weekly regimens for smear-positive pulmonary tuberculosis, including an assessment of a combined preparation of isoniazid, rifampin, and pyrazinamide. Results at 30 months. *Am Rev Respir Dis* 143: 700-706.
12. Hong Kong Chest Service-Tuberculosis Research Centre-British Medical Research Council (1991) A controlled clinical comparison of 6 and 8 months of antituberculosis chemotherapy in the treatment of patients with silicotuberculosis in Hong Kong. Hong Kong Chest Service/tuberculosis Research Centre, Madras/British Medical Research Council. *Am Rev Respir Dis* 143: 262-267.
13. Singapore Tuberculosis Service-British Medical Research Council (1991) Assessment of a daily combined preparation of isoniazid, rifampin, and pyrazinamide in a controlled trial of three 6-month regimens for smear-positive pulmonary tuberculosis. Singapore Tuberculosis Service/British Medical Research Council. *Am Rev Respir Dis* 143: 707-712.
14. Balasubramanian R (1991) Fully intermittent six month regimens for pulmonary tuberculosis in south India. *Indian J Tuberc* 38: 51-53.
15. Hong Kong Tuberculosis Treatment Services-British Medical Research Council (1975) Controlled trial of 6- and 9-month regimens of daily and intermittent streptomycin plus isoniazid plus pyrazinamide for pulmonary tuberculosis in Hong Kong. *Tubercle* 56: 81-96.
16. Hong Kong Tuberculosis Treatment Services-British Medical Research Council (1977) Controlled trial of 6-month and 9-month regimens of daily and intermittent streptomycin plus isoniazid plus pyrazinamide for pulmonary tuberculosis in Hong Kong. The results up to 30 months. *Am Rev Respir Dis* 115: 727-735.

17. Hong Kong Chest Service-British Medical Research Council (1978) Controlled trial of 6-month and 8-month regimens in the treatment of pulmonary tuberculosis. First report. *Am Rev Respir Dis* 118: 219-228.
18. Hong Kong Chest Service-British Medical Research Council (1979) Controlled trial of 6-month and 8-month regimens in the treatment of pulmonary tuberculosis: the results up to 24 months. *Tubercle* 60: 201-210.
19. Singapore Tuberculosis Service-British Medical Research Council (1979) Clinical trial of six-month and four-month regimens of chemotherapy in the treatment of pulmonary tuberculosis. *Am Rev Respir Dis* 119: 579-585.
20. Singapore Tuberculosis Service-British Medical Research Council (1981) Clinical trial of six-month and four-month regimens of chemotherapy in the treatment of pulmonary tuberculosis: the results up to 30 months. *Tubercle* 62: 95-102.
21. Singapore Tuberculosis Service-British Medical Research Council (1986) Long-term follow-up of a clinical trial of six-month and four-month regimens of chemotherapy in the treatment of pulmonary tuberculosis. *Am Rev Respir Dis* 133: 779-783.
22. Santha T, Nazareth O, Krishnamurthy MS, Balasubramanian R, Vijayan VK et al. (1989) Treatment of pulmonary tuberculosis with short course chemotherapy in south India--5-year follow up. *Tubercle* 70: 229-234.
23. Tripathy SP, Ramakrishnan CV, Nazareth O, Parthasarathy R, Santha Devi T et al. (1983) Study of chemotherapy regimens of 5 and 7 months' duration and the role of corticosteroids in the treatment of sputum-positive patients with pulmonary tuberculosis in South India. *Tubercle* 64: 73-91.
24. Tuberculosis Research Centre MaNTIB (1986) A controlled clinical trial of 3- and 5-month regimens in the treatment of sputum-positive pulmonary tuberculosis in South India. *Am Rev Respir Dis* 134: 27-33.
25. Hong Kong Chest Service-British Medical Research Council (1982) Controlled trial of 4 three-times-weekly regimens and a daily regimen all given for 6 months for pulmonary tuberculosis. Second report: the results up to 24 months. *Tubercle* 63: 89-98.
26. Hong Kong Chest Service-British Medical Research Council (1981) Controlled trial of four thrice-weekly regimens and a daily regimen all given for 6 months for pulmonary tuberculosis. *Lancet* 1: 171-174.
27. Hong Kong Chest Service-British Medical Research Council (1987) Five-year follow-up of a controlled trial of five 6-month regimens of chemotherapy for pulmonary tuberculosis. *Am Rev Respir Dis* 136: 1339-1342.
28. Hong Kong Chest Service-British Medical Research Council (1987) Five-year follow-up of a controlled trial of five 6-month regimens of chemotherapy for pulmonary tuberculosis. *Am Rev Respir Dis* 136: 1339-1342.
29. Singapore Tuberculosis Service-British Medical Research Council (1988) Five-year follow-up of a clinical trial of three 6-month regimens of chemotherapy given intermittently in the continuation phase in the treatment of pulmonary tuberculosis. *Am Rev Respir Dis* 137: 1147-1150.
30. Singapore Tuberculosis Service-British Medical Research Council (1985) Clinical trial of three 6-month regimens of chemotherapy given intermittently in the continuation phase in the treatment of pulmonary tuberculosis. *Am Rev Respir Dis* 132: 374-378.
31. Combs DL, O'Brien RJ, Geiter LJ (1990) USPHS Tuberculosis Short-Course Chemotherapy Trial 21: effectiveness, toxicity, and acceptability. The report of final results. *Ann Intern Med* 112: 397-406.
32. Jindani A, Nunn AJ, Enarson DA (2004) Two 8-month regimens of chemotherapy for treatment of newly diagnosed pulmonary tuberculosis: international multicentre randomised trial. *Lancet* 364: 1244-1251.
33. Okwera A, Johnson JL, Luzze H, Nsubuga P, Kayanja H et al. (2006) Comparison of intermittent ethambutol with rifampicin-based regimens in HIV-infected adults with PTB, Kampala. *Int J Tuberc Lung Dis* 10: 39-44.
